# Supplementary material for: Co3O4nanostructures with a high rate performance as anode materials for lithium-ion batteries, prepared via book-like cobalt–organic frameworks
Source: Royal Society of Chemistry journal article supplement (doi:10.1039/c4ce01277a), 2014-09-15
Supplement: c4ce01277a1.pdf [file c4ce01277a1.pdf]

## Electronic Supplementary data

# Nanostructural cobalt oxide as high performance anode for lithium-ion battery: Prepared via book-like cobalt-organic framework

Bo Yan, Lin Chen, Yuanjun Liu, Guoxing Zhu, Chunguang Wang, Han Zhang, Gang Yang,

Haitao Ye, Aihua Yuan

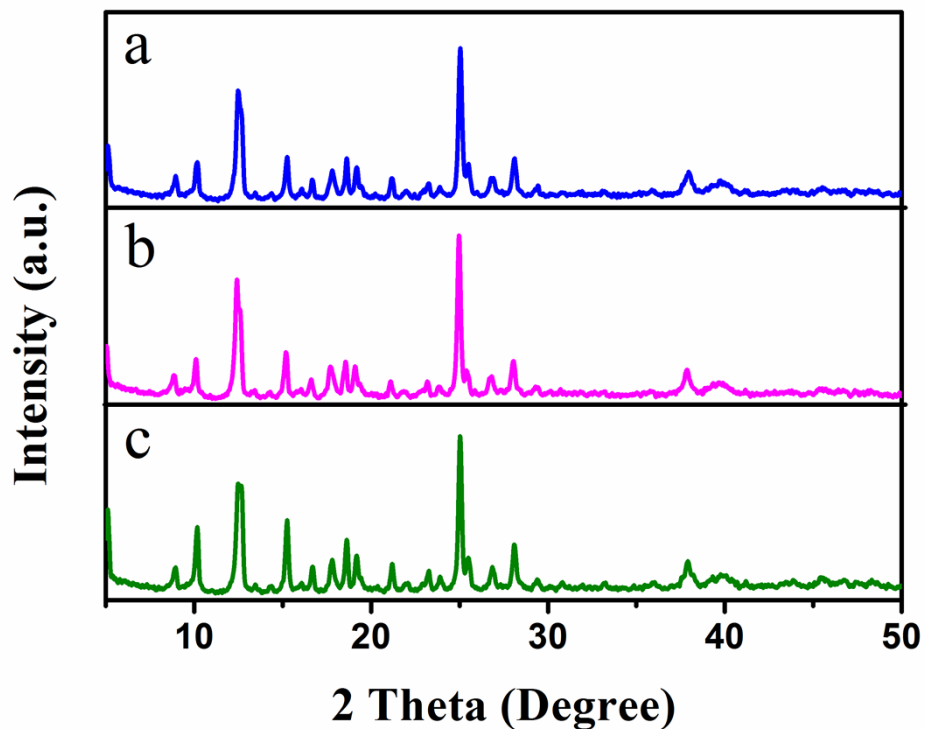

Fig. S1. XRD pattern of (a) Co-CP-A, (b) Co-CP-B, and (c) Co-CP-C.

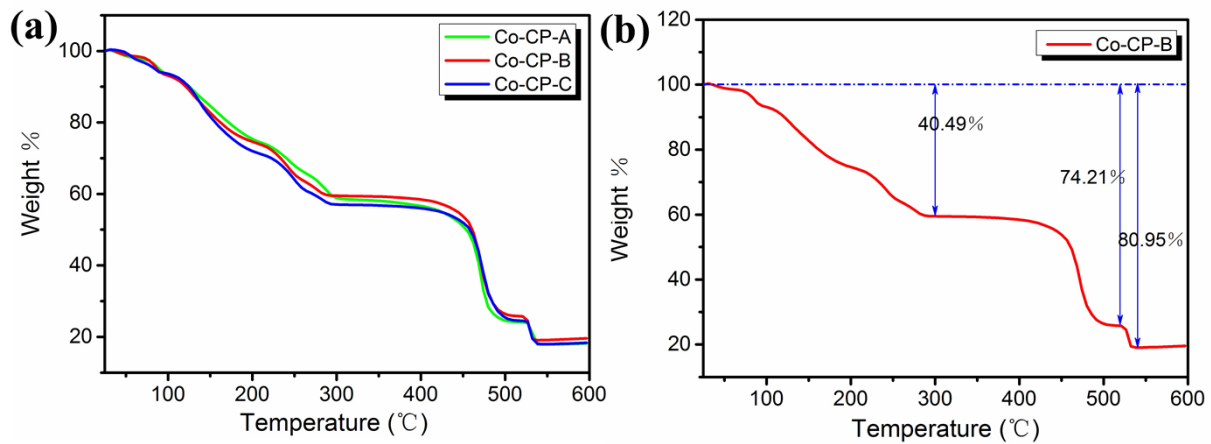

**Fig. S2.** TGA curve of the as-obtained sample (a) Co-CP-A, Co-CP-B, and Co-CP-C. (b) Co-CP-B.

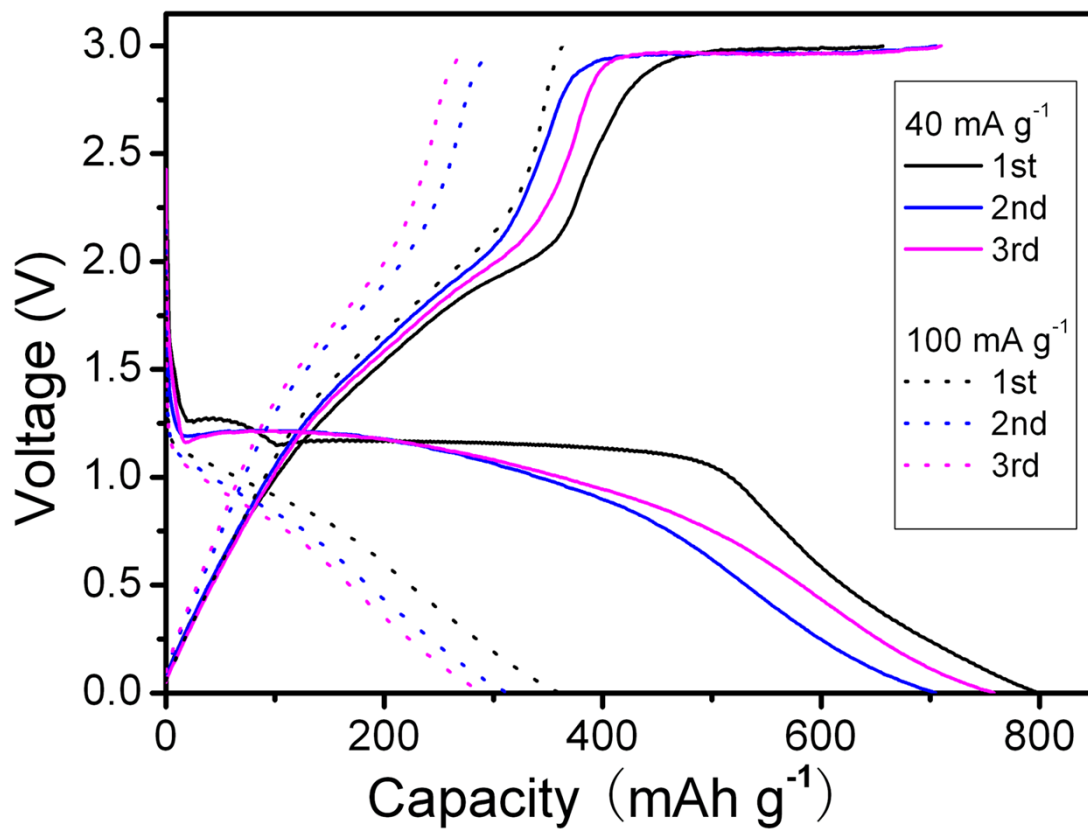

**Fig. S3** The first three charge/discharge cycles of Co<sub>3</sub>O<sub>4</sub>-C at the current densities of 40 and 100 mA g<sup>-1</sup> respectively.
